# Supplementary material for: Astrocytic Nrf2 expression protects spinal cord from oxidative stress following spinal cord injury in a male mouse model
Source: PubMed Central journal article supplement (PMC9169394; doi:10.1186/s12974-022-02491-1), 2022-06-06

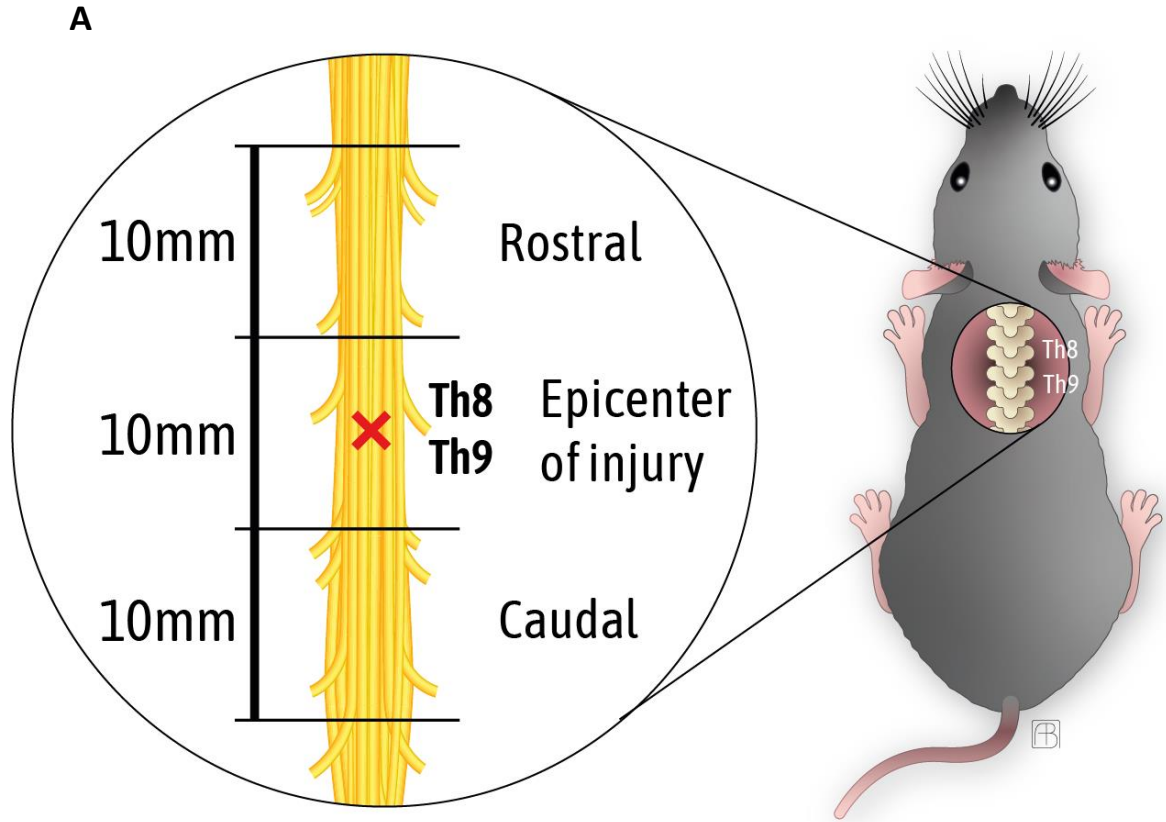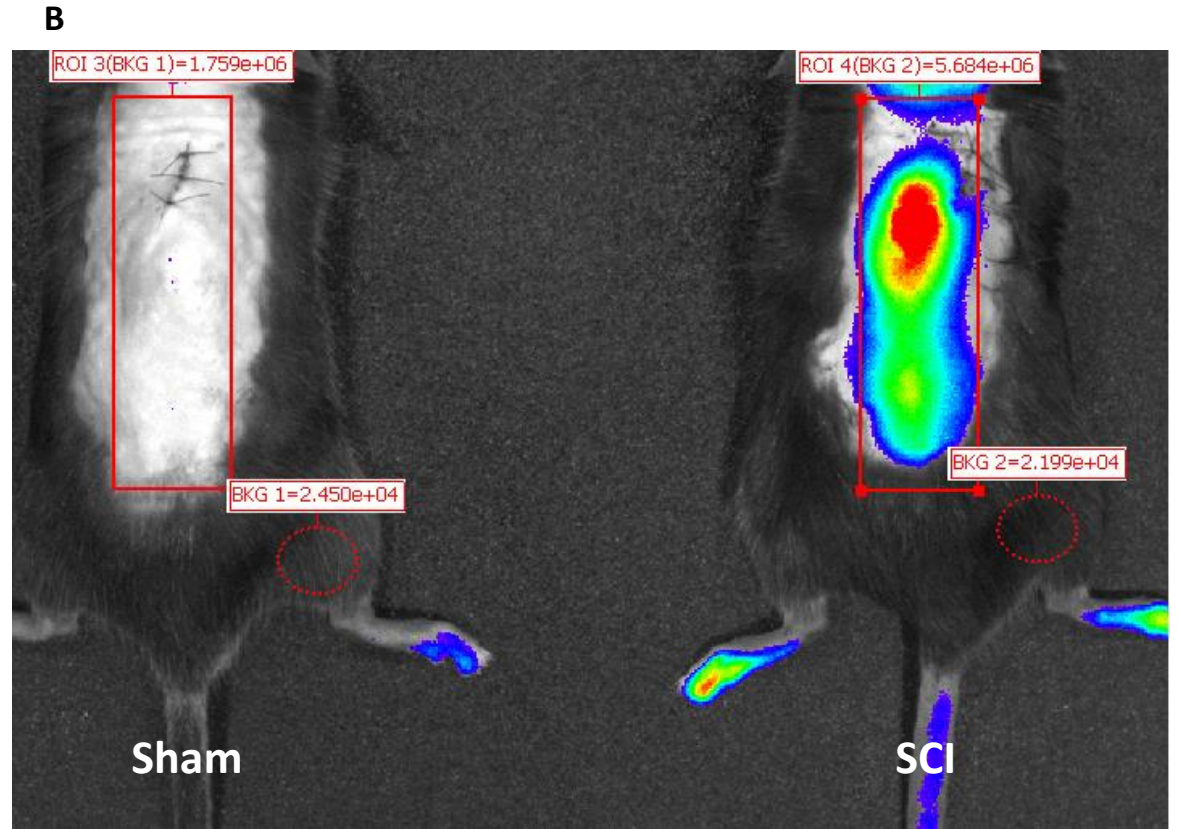

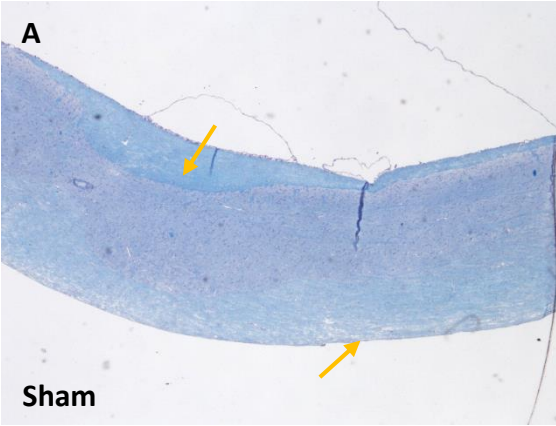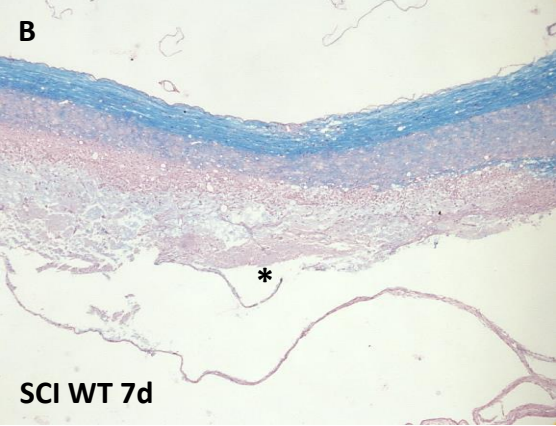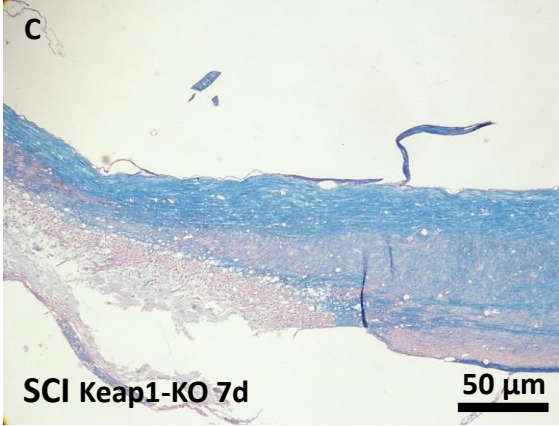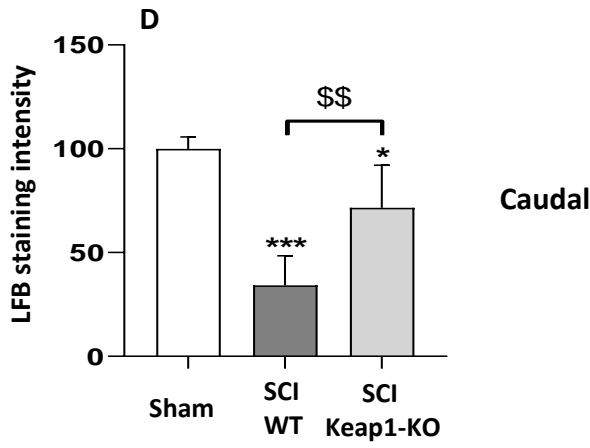

**NQO1**  
50 kDa

**beta-actin**  
42 kDa

**HO-1**  
32 kDa

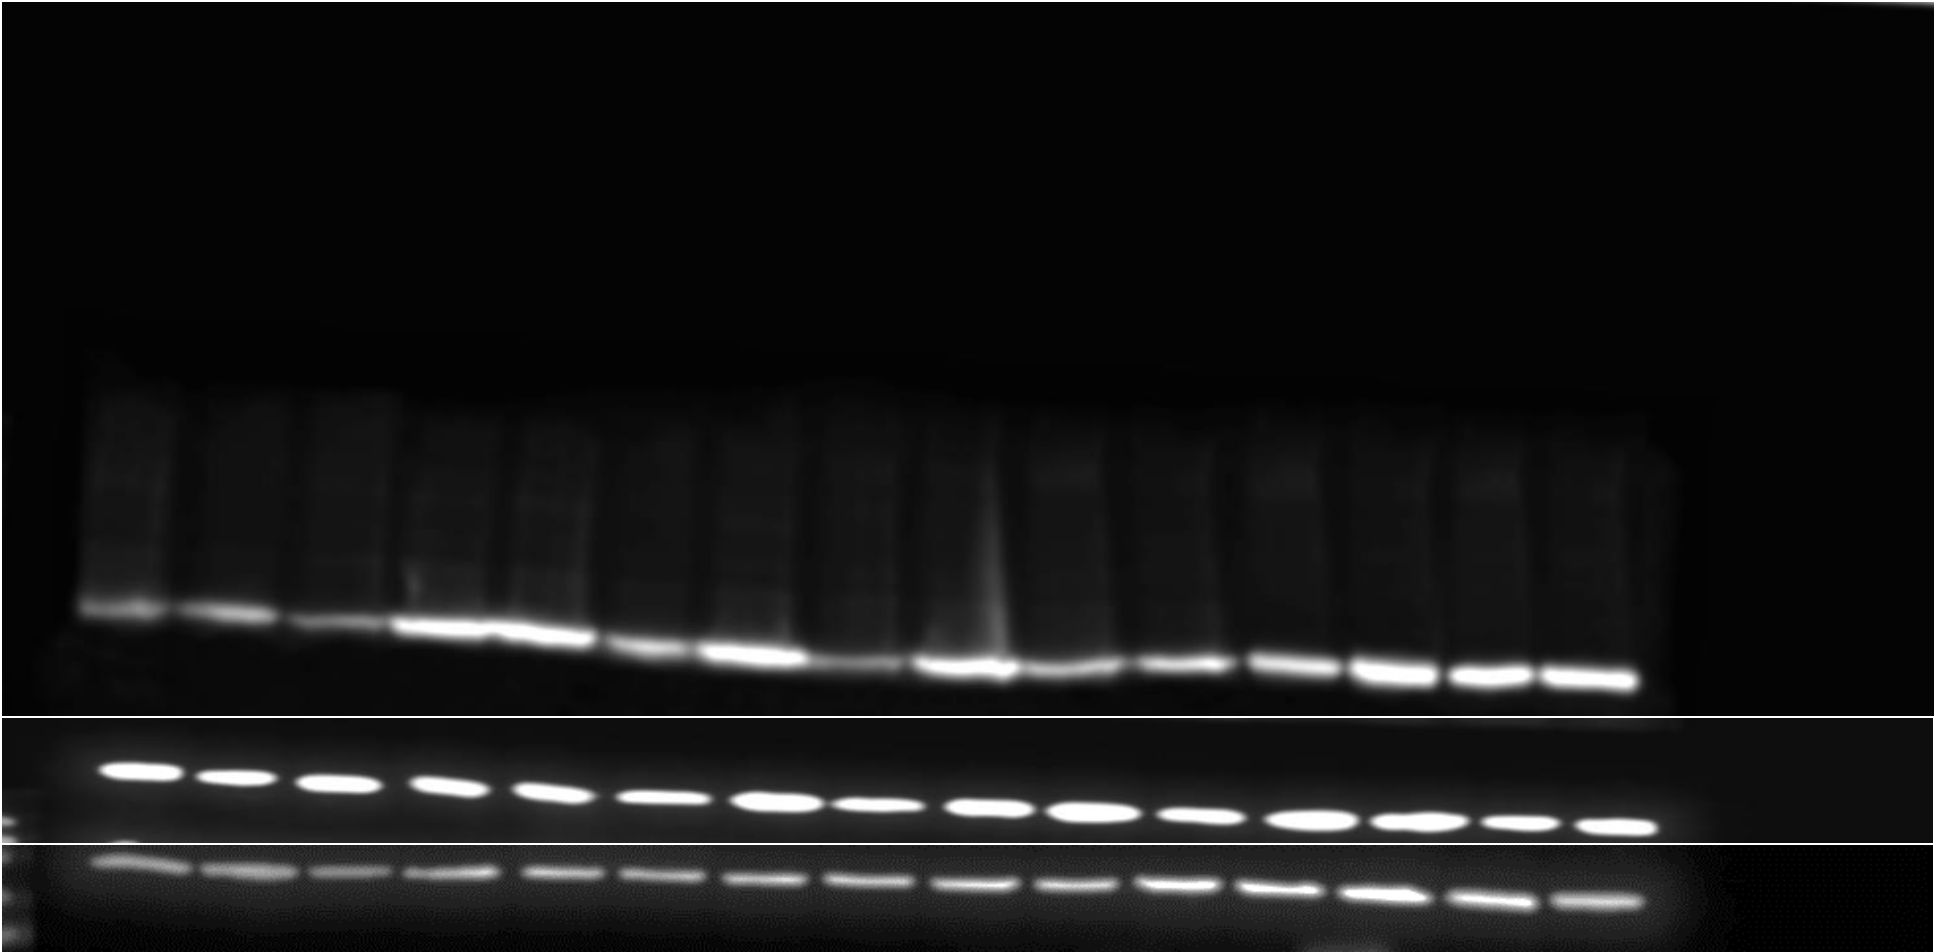

Supplement: 12974_2022_2491_MOESM1_ESM.pdf [file 12974_2022_2491_MOESM1_ESM.pdf]
